# Supplementary material for: Surface-enhanced Raman spectroscopy of one and a few molecules of acid 4-mercaptobenzoic in AgNP enabled by hot spots generated by hydrogen bonding
Source: Royal Society of Chemistry journal article supplement (doi:10.1039/d2cp03375e), 2022-01-01
Supplement: d2cp03375e1.pdf [file d2cp03375e1.pdf]

## Supporting Information for

### **SERS spectrum in the regime of one and a few molecules of acid 4- mercaptobenzoic in AgNP enabled by hot spots generated by hydrogen bonding.**

Flávia C. Marques,<sup>a,\*</sup> Raisa Siqueira Alves,<sup>b</sup> Diego Pereira dos Santos,<sup>b</sup> and Gustavo F. S. Andrade <sup>a,\*</sup>.

### **S1. The atomic coordinates for the optimized structure of model complex [AgNP-(4-MBA)<sub>2</sub>-AgNP].**

|                       | <b>X</b>   | <b>Y</b>   | <b>Z</b>  |
|-----------------------|------------|------------|-----------|
| <b>C<sub>1</sub></b>  | 5.6051420  | -0.6721180 | 1.6644390 |
| <b>C<sub>2</sub></b>  | 5.2594700  | 0.6844570  | 1.7312970 |
| <b>C<sub>3</sub></b>  | 3.9435920  | 1.0896960  | 1.5570090 |
| <b>C<sub>4</sub></b>  | 2.9415970  | 0.1458610  | 1.3151630 |
| <b>C<sub>5</sub></b>  | 3.2792040  | -1.2094590 | 1.2508750 |
| <b>C<sub>6</sub></b>  | 4.5934610  | -1.6133410 | 1.4240910 |
| <b>H<sub>7</sub></b>  | 6.0287920  | 1.4251840  | 1.9209390 |
| <b>H<sub>8</sub></b>  | 3.6906580  | 2.1423660  | 1.6086060 |
| <b>H<sub>9</sub></b>  | 2.5015360  | -1.9415170 | 1.0634820 |
| <b>H<sub>10</sub></b> | 4.8461350  | -2.6668600 | 1.3702460 |
| <b>C<sub>11</sub></b> | 1.5330990  | 0.5479770  | 1.1284220 |
| <b>O<sub>12</sub></b> | 0.6315170  | -0.2767130 | 0.9344550 |
| <b>O<sub>13</sub></b> | 1.3055660  | 1.8427080  | 1.1833020 |
| <b>H<sub>14</sub></b> | 0.3221960  | 2.0418210  | 1.0493180 |
| <b>S<sub>15</sub></b> | 7.2796390  | -1.2040710 | 1.9519720 |
| <b>C<sub>16</sub></b> | -6.2120540 | 2.8404700  | 0.2736050 |
| <b>C<sub>17</sub></b> | -5.8623450 | 1.4769190  | 0.2442800 |
| <b>C<sub>18</sub></b> | -4.5459880 | 1.0685270  | 0.3758850 |
| <b>C<sub>19</sub></b> | -3.5218300 | 2.0080780  | 0.5467110 |
| <b>C<sub>20</sub></b> | -3.8544360 | 3.3683400  | 0.5805690 |
| <b>C<sub>21</sub></b> | -5.1702590 | 3.7750980  | 0.4468080 |
| <b>H<sub>22</sub></b> | -6.6363050 | 0.7259560  | 0.1180160 |

|                        |             |            |            |
|------------------------|-------------|------------|------------|
| <b>H<sub>23</sub></b>  | -4.3099520  | 0.0100740  | 0.3483180  |
| <b>H<sub>24</sub></b>  | -3.0671410  | 4.1027170  | 0.7131970  |
| <b>H<sub>25</sub></b>  | -5.4095720  | 4.8332610  | 0.4743030  |
| <b>C<sub>26</sub></b>  | -2.1192530  | 1.6000160  | 0.6927400  |
| <b>O<sub>27</sub></b>  | -1.1980860  | 2.4152850  | 0.8515630  |
| <b>O<sub>28</sub></b>  | -1.8996720  | 0.2997450  | 0.6448360  |
| <b>H<sub>29</sub></b>  | -0.9196720  | 0.0991390  | 0.7549820  |
| <b>S<sub>30</sub></b>  | -7.8692280  | 3.4123500  | 0.1111320  |
| <b>Ag<sub>31</sub></b> | 8.7674300   | 0.3728400  | 0.5779310  |
| <b>Ag<sub>32</sub></b> | 10.1219240  | -0.4854190 | -1.6638400 |
| <b>Ag<sub>33</sub></b> | 7.9345630   | -2.3552700 | -0.2112610 |
| <b>Ag<sub>34</sub></b> | 10.4301170  | 2.0480250  | -0.7830180 |
| <b>Ag<sub>35</sub></b> | -8.8474140  | -1.3775380 | -0.2426790 |
| <b>Ag<sub>36</sub></b> | -9.3349430  | 1.4156160  | -0.3334180 |
| <b>Ag<sub>37</sub></b> | -11.2991500 | -0.3115960 | -0.9098000 |
| <b>Ag<sub>38</sub></b> | -0.9098000  | -2.9452950 | 0.3589430  |

## S2. UV-Vis spectra of AgNP and AgNP at pH= 4.

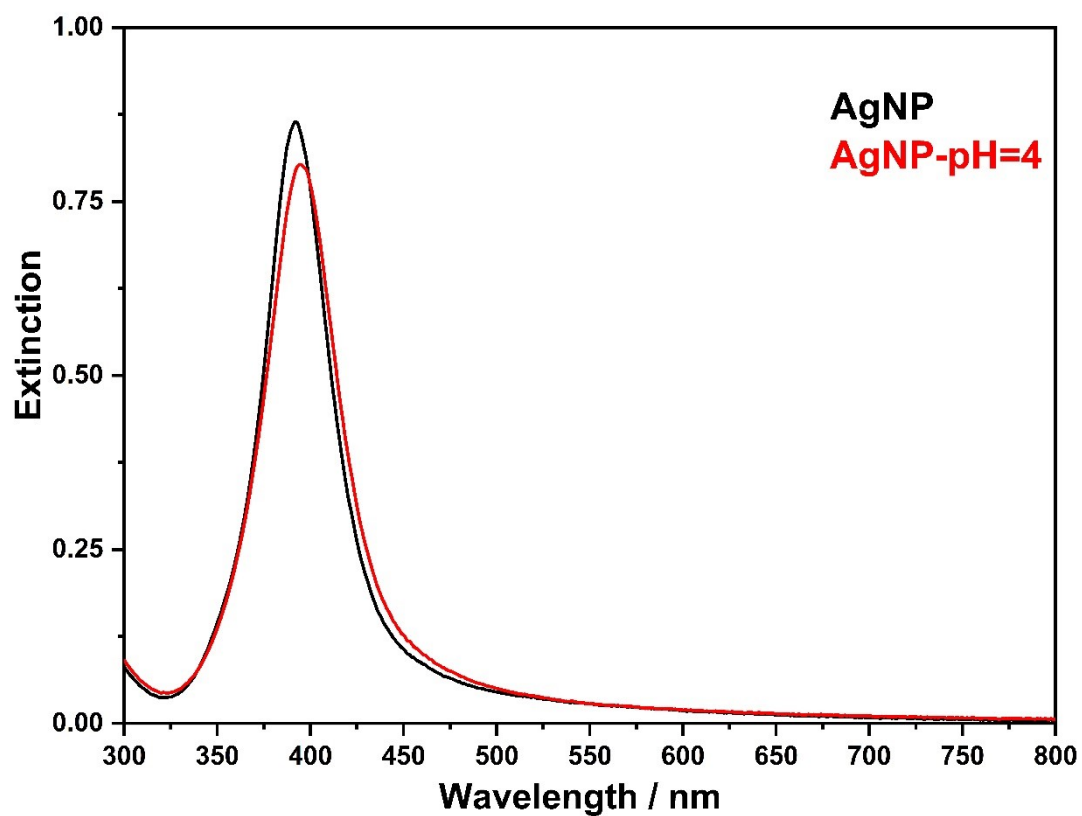

Figure S2: Extinction spectrum of Ag colloid compared to Ag colloid after the addition of 5  $\mu\text{L}$  of  $\text{HCl}$   $0.1 \text{ mol L}^{-1}$  ( $\text{pH}=4$ ).

S3. Evolution of UV-Vis spectra of 4-MBA ( $5.0 \times 10^{-7}$  mol L<sup>-1</sup>) adsorbed on AgNP after the addition of 50.0  $\mu$ L of HCl 0.1 mol L<sup>-1</sup> as a function of time.

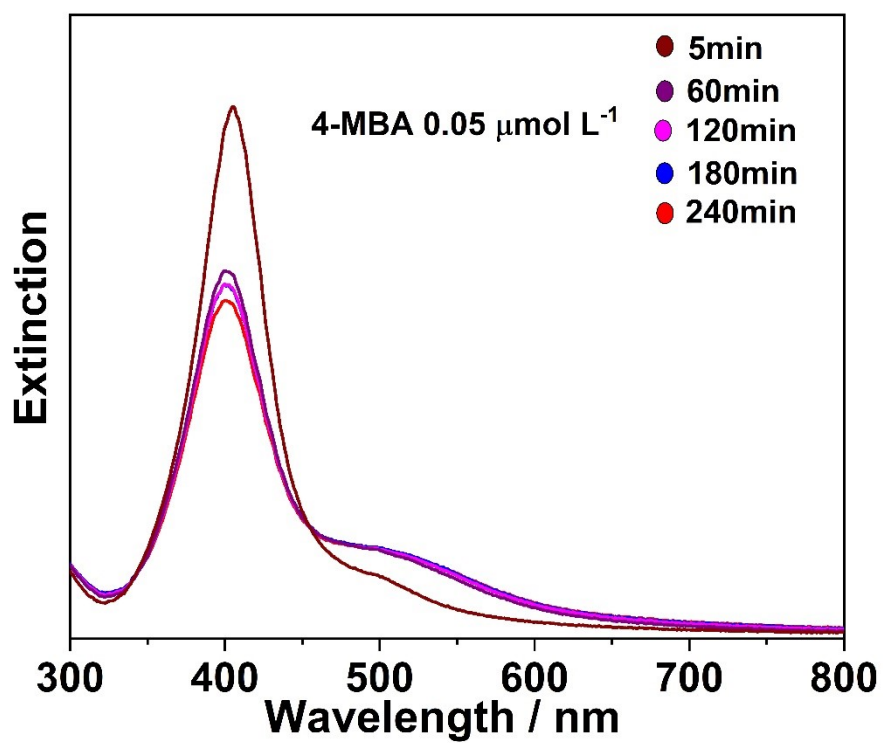

Figure S3: UV-Vis spectra of  $0.05 \mu\text{mol L}^{-1}$  4-MBA with added HCl to pH=4 as a function of time after adding the acid.

S4. DLS results of the size distribution for the AgNP suspensions with 4-MBA ( $5.0 \times 10^{-7}$  mol L<sup>-1</sup>) in pH=4, 6, and 9.

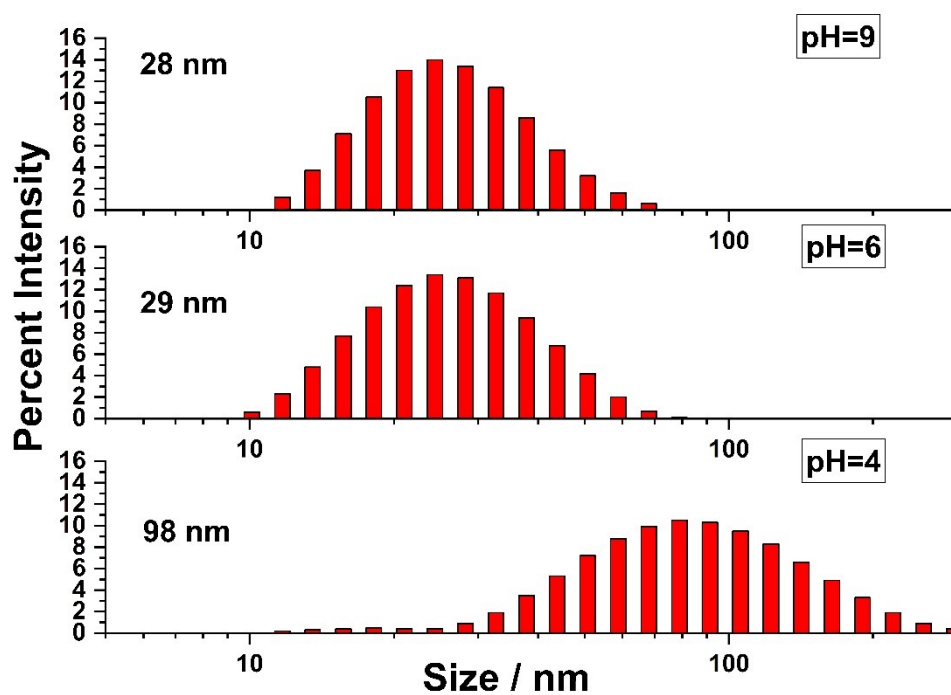

Figure S4. AgNP size distribution was measured by DLS in pH=9, 6, and 4, respectively.

## S5. DLS analysis of the size distribution for the AgNP suspensions with 4-MBA in different concentrations.

Confidence intervals (CI) were estimated for the size distributions of AgNP as a function of the concentration of 4-MBA obtained from the DLS analysis compared to AgNP without the addition of 4-MBA. An asymmetrical sample distribution can be seen in the histograms, *i.e.*, a Log-Normal distribution. For a 95% confidence level, the confidence interval a Log-Normal sample distribution is given by the lower and upper limits described by Equation S1.<sup>1</sup>

$$e^{(\ln(\bar{d}) - (1.96 * \sigma))} \leq CI \leq e^{(\ln(\bar{d}) + (1.96 * \sigma))}$$

Equation S1

Where  $\bar{d}$  is an average diameter,  $\sigma$  the standard deviation and the 95% confidence level is 1.96. The confidence intervals are shown in Figure S5.

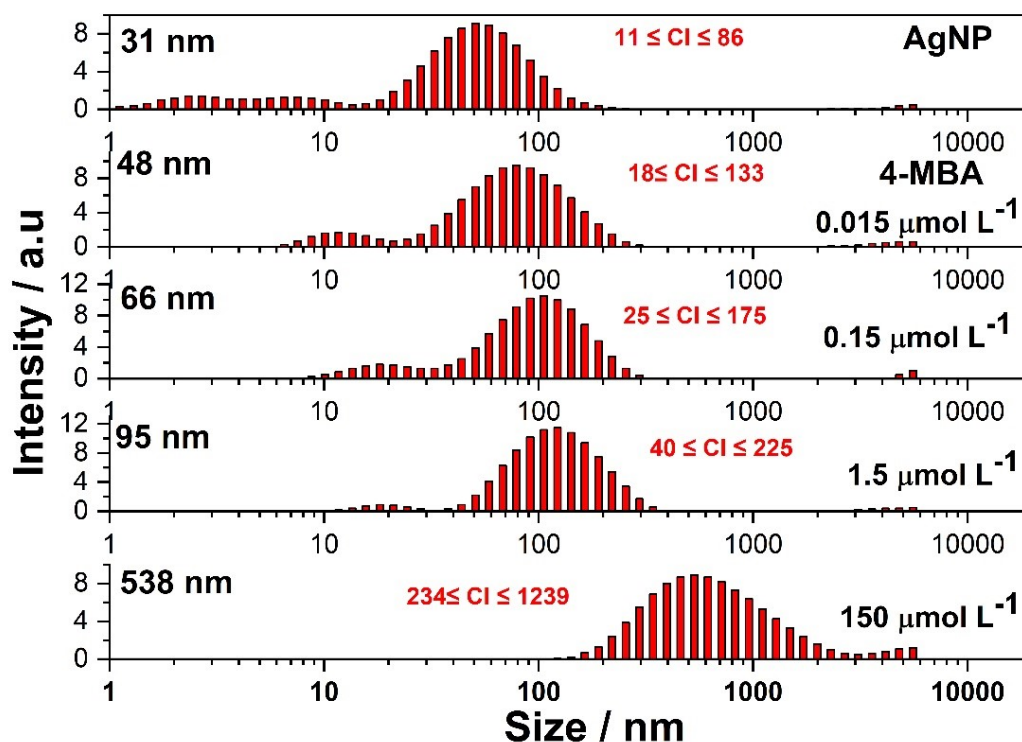

**Figure S5:** Size distribution of AgNP nanostructures as a function of 4-MBA concentration obtained from DLS analysis. The first result was obtained for AgNP without any 4-MBA. Each result presents the average size measured in the analysis.

**S6. The Raman spectrum of the SERS substrate in a 1:1 ratio (AgNP: water ) at pH=4.**

To overcome the difficulties of obtaining the SERS spectrum of 4-MBA in a single-molecule regime, a SERS substrate that does not present a signal in the same region as the adsorbate was used. Figure S6 shows the spectrum of the SERS substrate obtained in a 1:1 ratio (AgNP: water), with pH adjustment to 4 with HCl 0.1 mol L<sup>-1</sup>. Note a low-intensity band at 1638 cm<sup>-1</sup> referring to the water in the solution, attributed to the angular deformation of the water. Other Raman bands are not observed in the obtained spectrum. Therefore, AgNP was used to obtain the SM-SERS spectrum.

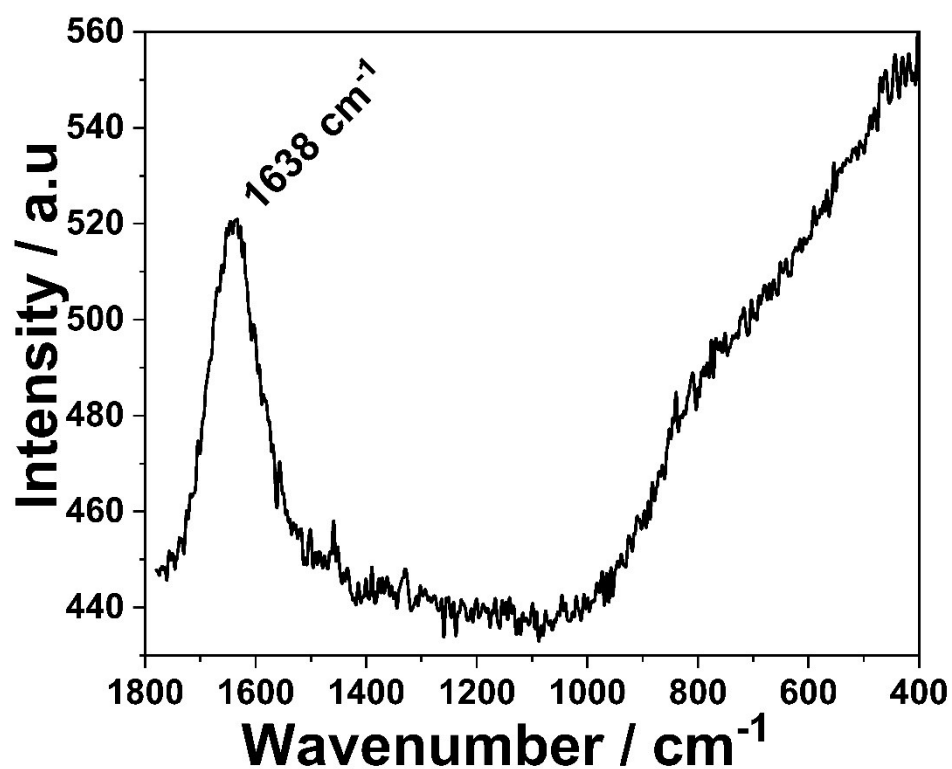

Figure S6: Spectrum of the SERS substrate in a 1:1 ratio (AgNP: water ) at pH=4.

## S7. Classical electrodynamics simulations.

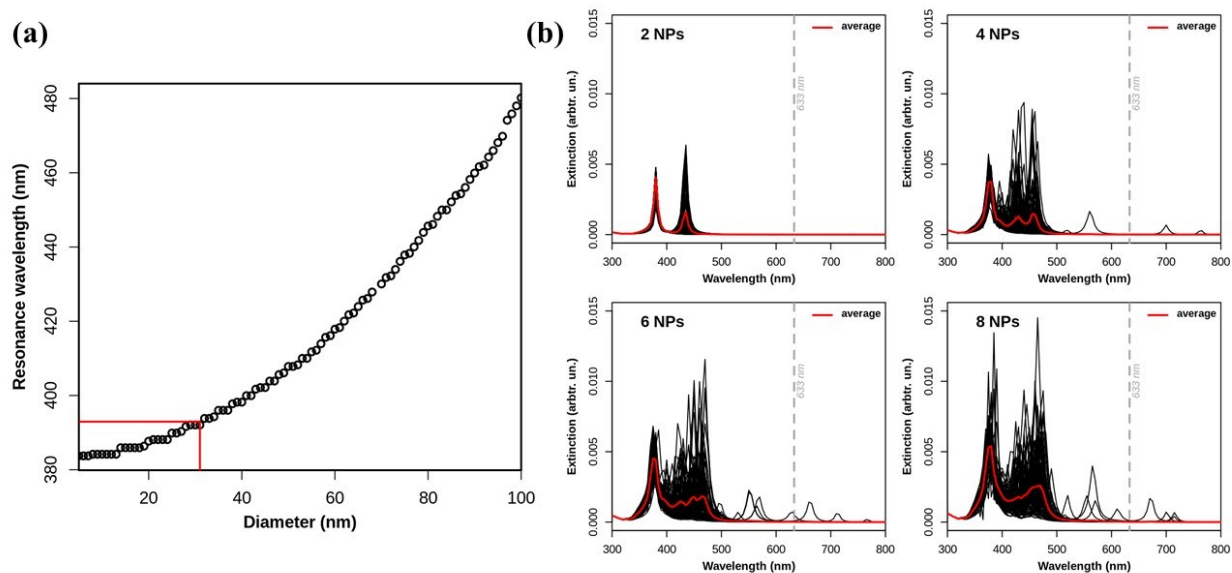

Figure S7: (a) The diameter nanoparticles of the 30 nm was obtained from fitting of resonance wavelength versus diameter by simulated via classical electrodynamics using the generalized mie theory (GMT) and (b) Simulated extinction spectrum for different aggregates randomly formed by 30 nm nanoparticles.

### References

1. E. Taylor and T. J. Webster, Reducing infections through nanotechnology and nanoparticles., *Int. J. Nanomedicine*, 2011, **6**, 1463–1473.
